# Supplementary material
Source: Springer Nature journal article supplement (https://www.springermedizin.de/resource/supplementary/12879_2007_598_MOESM4_ESM.pdf/9449448)

M 1 2 3 4 5 6 M 7 8 9 10 R M

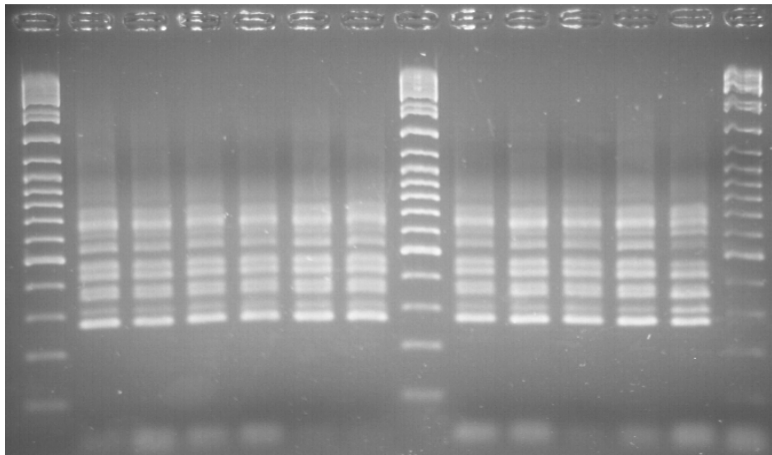

Supplement: MOESM4 [file 9449448]
